# Supplementary material for: Baseline separation of amino acid biomarkers of hepatocellular carcinoma by polyvinylpyrrolidone-filled capillary electrophoresis with light-emitting diode-induced fluorescence in the presence of mixed micelles
Source: Royal Society of Chemistry journal article supplement (doi:10.1039/c4an01550a), 2014-11-25

## **Supplementary information**

Baseline separation of amino acid biomarkers of hepatocellular carcinoma by polyvinylpyrrolidone-filled capillary electrophoresis with light-emitting diode-induced fluorescence in the presence of mixed micelles

Yen-Chu Chen and Po-Ling Chang\*

Department of Chemistry, Tunghai University, Taichung, Taiwan

Table S1. The structure, Mw, logP and net charge of AAs and AA derivatives.

| Name                               | Structure of AA | logP  | Net charge at pH 7.0 | Structure of AA-CBIs | Mw  | logP | Net charge at pH 7.0 |
|------------------------------------|-----------------|-------|----------------------|----------------------|-----|------|----------------------|
| Aspartic acid                      |                 | -1.22 | -0.990               |                      | 309 | 2.44 | -1.998               |
| Glutamic acid                      |                 | -0.93 | -1.002               |                      | 322 | 2.73 | -2.000               |
| $\alpha$ -Amino adipic acid (I.S.) |                 | -0.49 | -1.002               |                      | 336 | 3.17 | -1.999               |
| Glycine                            |                 | -1.15 | -0.006               |                      | 250 | 2.51 | -1.000               |
| Glutamine                          |                 | -1.74 | -0.005               |                      | 321 | 1.92 | -1.000               |
| Serine                             |                 | -1.63 | -0.012               |                      | 280 | 2.03 | -1.000               |
| Alanine                            |                 | -0.58 | -0.003               |                      | 264 | 3.08 | -1.000               |
| Asparagine                         |                 | -2.03 | -0.036               |                      | 308 | 1.63 | -1.000               |
| Threonine                          |                 | -1.21 | -0.010               |                      | 294 | 2.45 | -1.000               |

|            |  |       |        |  |     |      |        |
|------------|--|-------|--------|--|-----|------|--------|
| Citrulline |  | -1.67 | -0.006 |  | 350 | 1.99 | -1.000 |
| Methionine |  | 0.07  | -0.003 |  | 324 | 3.73 | -1.000 |
| Histidine  |  | -1.01 | 0.115  |  | 330 | 2.65 | -0.740 |
| Norvaline  |  | 0.39  | -0.003 |  | 292 | 4.05 | -1.000 |
| Valine     |  | 0.31  | -0.002 |  | 292 | 3.97 | -1.000 |
| Norleucine |  | 0.83  | -0.003 |  | 306 | 4.49 | -1.000 |
| Leucine    |  | 0.68  | -0.003 |  | 306 | 4.33 | -1.000 |
| Isoleucine |  | 0.75  | -0.002 |  | 306 | 4.41 | -1.000 |
| Cysteine   |  | -0.53 | -0.010 |  | 296 | 3.31 | -1.001 |

|               |                                                                                     |       |        |                                                                                      |     |      |                                  |
|---------------|-------------------------------------------------------------------------------------|-------|--------|--------------------------------------------------------------------------------------|-----|------|----------------------------------|
| Phenylalanine | 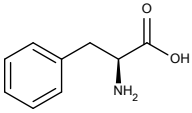   | 1.08  | -0.004 |    | 340 | 4.73 | -1.000                           |
| Tyrosine      |    | 0.77  | -0.010 |    | 356 | 4.43 | -1.003                           |
| Tryptophan    |    | 1.18  | -0.004 |    | 377 | 4.83 | -1.000                           |
| Lysine        |    | -0.71 | 0.996  |   | 322 | 2.95 | -0.001 (-<br>0.111 at pH<br>9.3) |
| Ornithine     |  | -1.16 | 0.996  |  | 307 | 2.50 | -0.001 (-<br>0.111 at pH<br>9.3) |
| Arginine      |  | -1.49 | 0.996  |  | 350 | 2.17 | 0.000 (-0.002<br>at pH 9.3)      |

Figure S1. The hydrogen bonding formation between PVP and the aromatic AAs (Trp and Tyr).

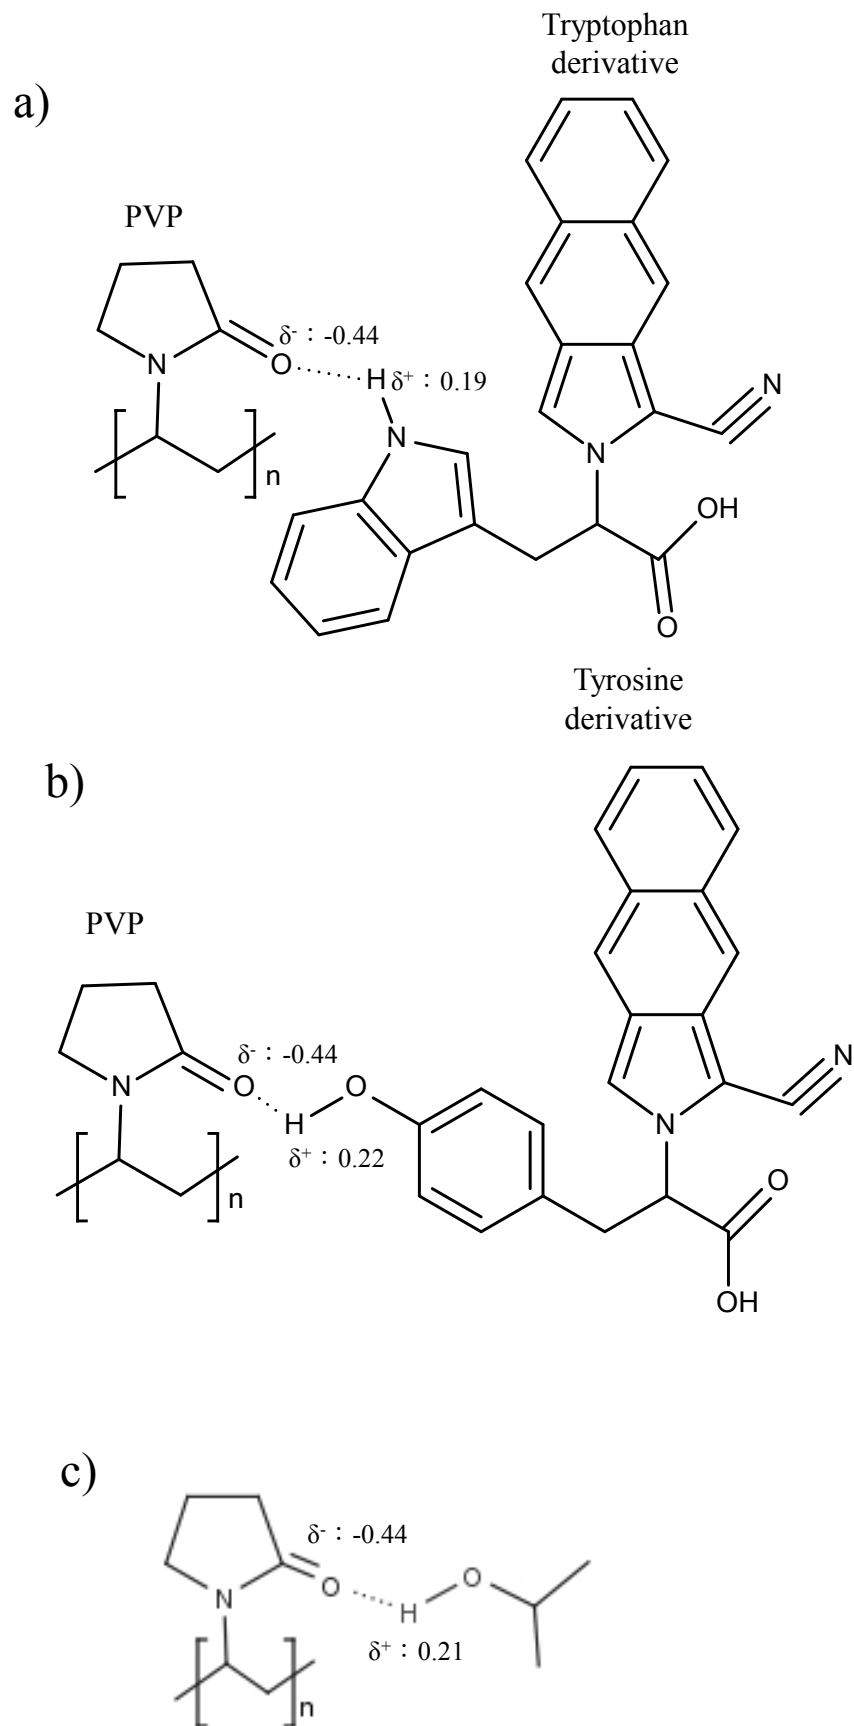

Figure S2. The impact of SDS on the separation of AA-CBIs by PVP in the absence of IP. The separations were completed using a) 5% PVP containing b) 10 mM, c) 20 mM and d) 30 mM SDS.

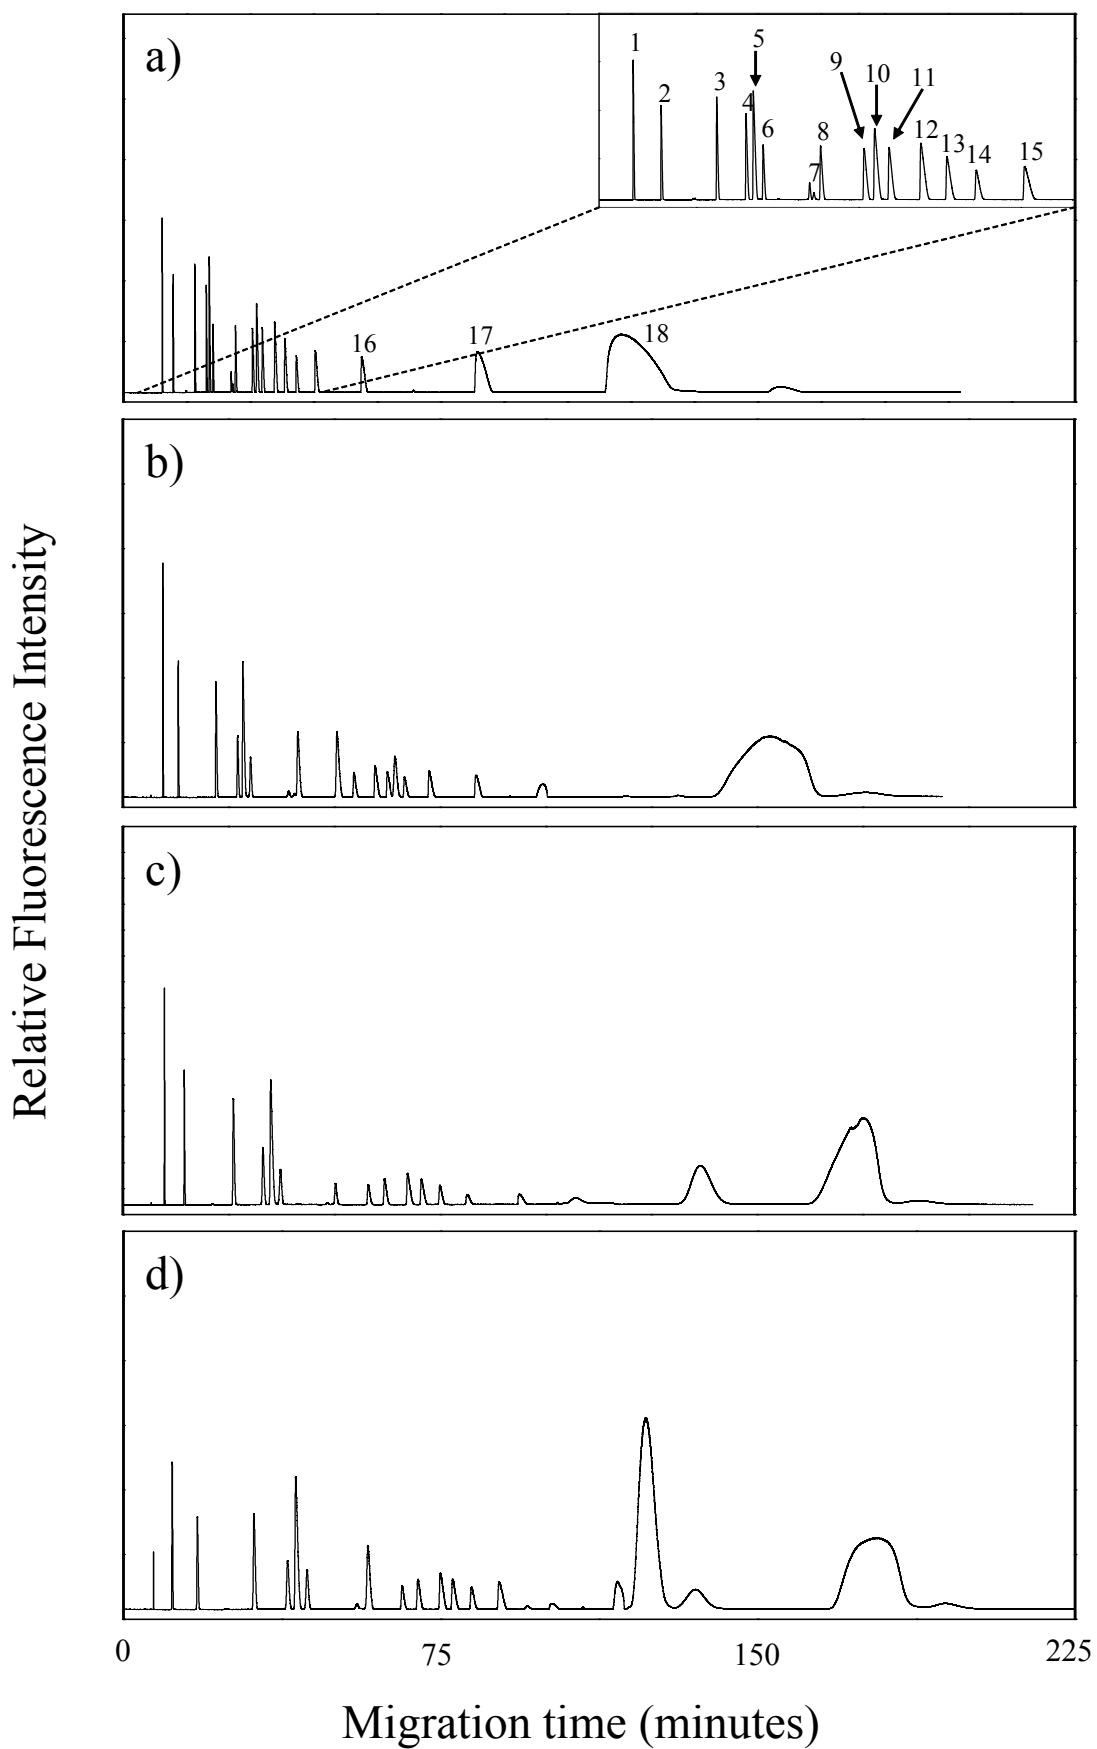

Figure S3. The matrix effect of the plasma on the derivatization and electrophoretic separation. The samples of a) untreated plasma, b) protein-removed plasma and c) ten-fold dilution of protein-removed plasma were utilized in the NDA derivatization.

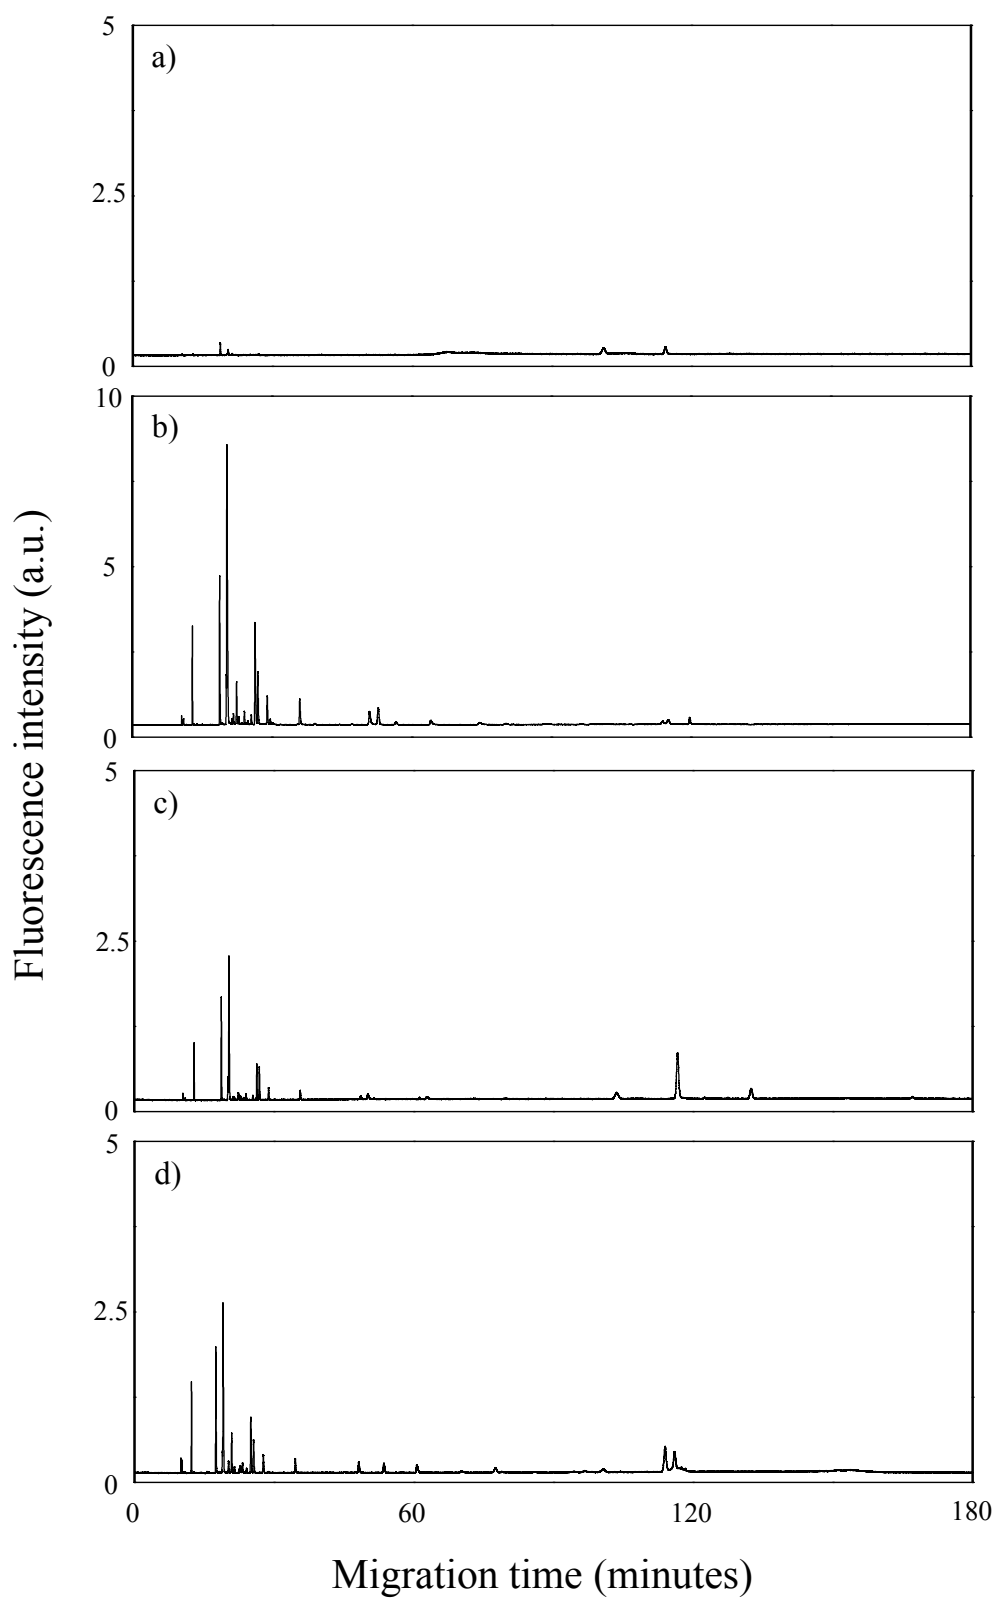

Figure S4. The stability of AA-CBIs of NDA. An AA-CBI sample was utilized to establish the stability of AA-CBIs of NDA by allowing the sample to stand at  $-20^{\circ}\text{C}$  for a) 0, b) 4, c) 8 and d) 12 h after NDA derivatization.

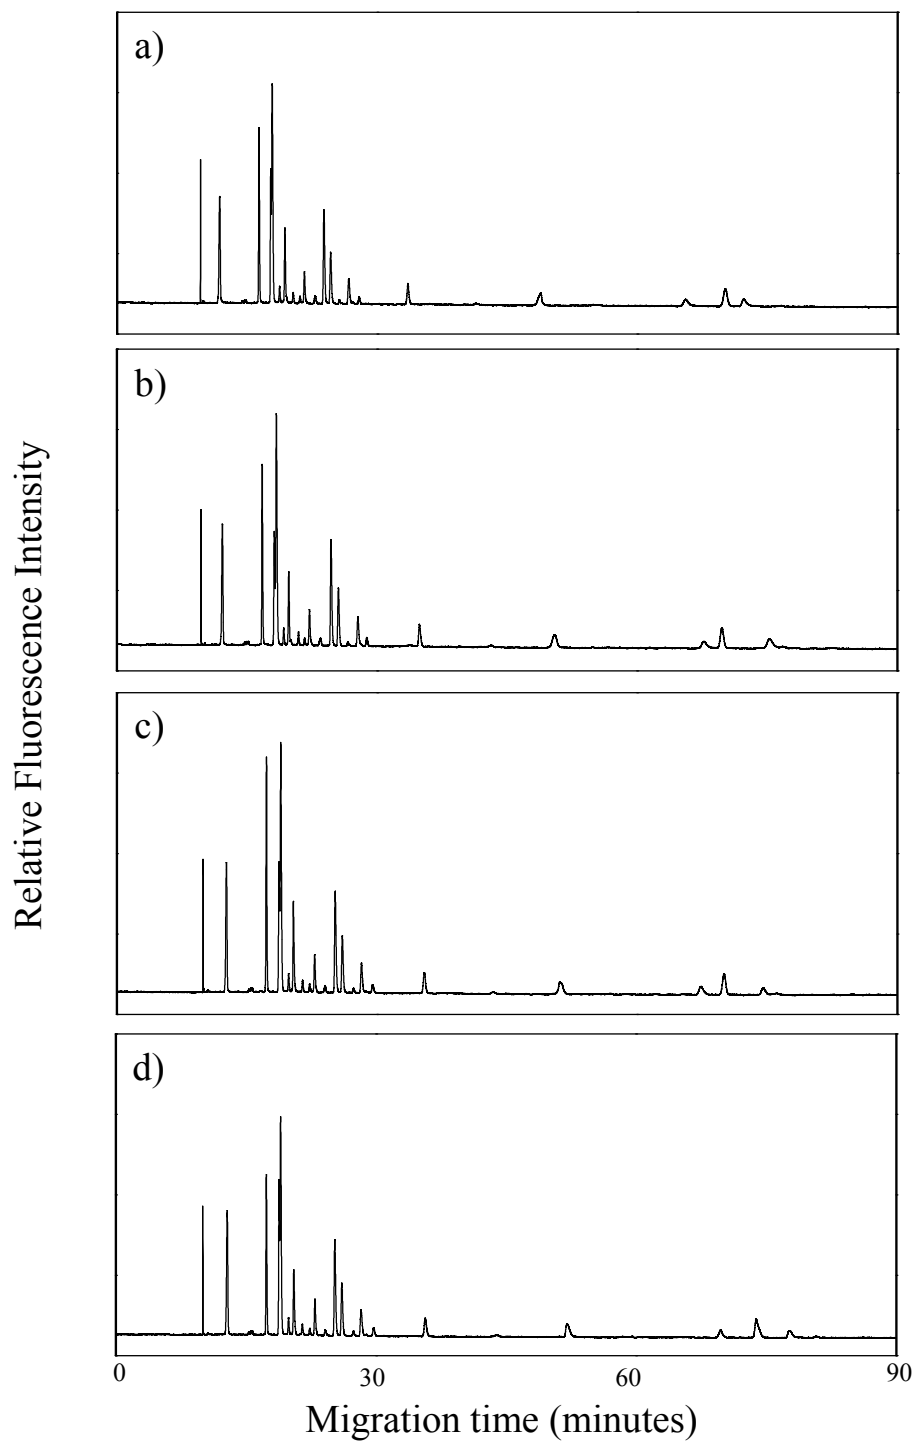



Figure S5. The reproducibility of AA derivatization by NDA and separation by PVP-filled capillary electrophoresis. The experiments were performed by five independent derivatizations of a standard AA mixture followed by electrophoretic separation using 5% PVP in the presence of IP (20%) and SDS (20 mM).  $\alpha$ -Aminoadipic acid was spiked into the plasma as the internal standard.

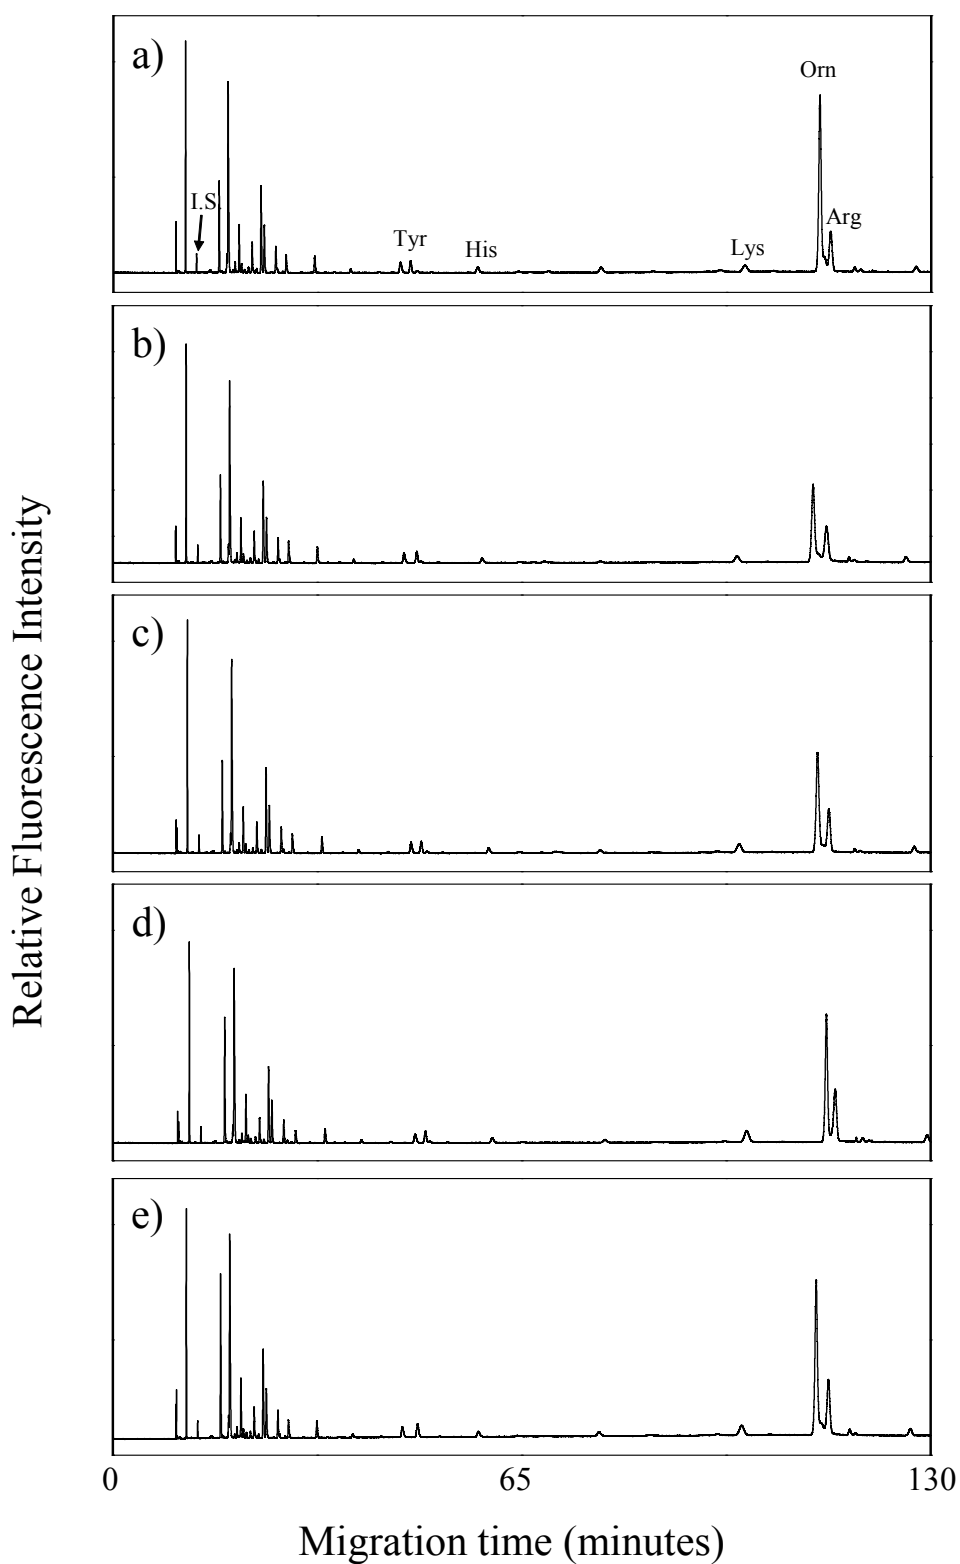

Supplement: c4an01550a1.pdf [file c4an01550a1.pdf]
